# Supplementary material for: High-precision analysis of potassium isotopes by MC-ICP-MS without collision cell using cool plasma technique in low-resolution mode
Source: Royal Society of Chemistry journal article supplement (doi:10.1039/d1ja00201e), 2021-01-01
Supplement: d1ja00201e1.xlsx [file d1ja00201e1.xlsx]

## Sheet: Figure S01
Figure S1. Schematic flow diagrams for the measurement and calculation protocols for the K isotope measurement on MC-ICP-MS in low resolution mode.
a) typical sequence for measurements
b) skeched procedures for data reduction

## Sheet: Table S01
Table S1. Signals of L3 and H1 cups with the changes of concentrations
Target Concentration (ppb)	Calculated Concentration# (ppb)	L3 (V)	H1 (V)	L3* (V)	H1* (V)
3.90625	6.52235	0.0784152	0.028482	0.0724899	0.00511393
7.8125	11.4332	0.132995	0.0321941	0.12707	0.00882605
15.625	21.5982	0.24597	0.0403694	0.240045	0.0170014
31.25	42.07	0.473495	0.0571578	0.46757	0.0337897
62.5	79.9345	0.894324	0.088847	0.888399	0.0654789
125	153.187	1.70846	0.151126	1.70253	0.127758
250	299.871	3.33871	0.275353	3.33279	0.251985
500	580.969	6.46286	0.513579	6.45694	0.490211
1000	1075.91	11.9637	0.93368	11.9578	0.910312
2000	2000	22.2341	1.71713	22.2282	1.69377
Acid Background		0.0059253	0.0233681
# The calculation is based on the intensity of 39K (L3) of the 2000ppb solution after the blank deduction.
* With background deduction

## Sheet: Table S02
Table S2. Potassium isotopic compositions of geological reference materials determined in the previous studies
Sample	δ41K (‰)	2SD	Literature
BHVO-2, Basalt, USGS, Kilauea Hawaii, Halemaumau crater (USA)
	-0.5	0.19	1
	-0.46	0.04	2
	-0.49	0.03	3
	-0.47	0.02	4
	-0.4	0.04	5
	-0.47	0.03	6
W-2a, Diabase, USGS, about 5 km of Centerville, Virginia (USA)
	-0.41	0.06	5
BCR-2, Basalt, USGS, Columbia (USA)
	-0.51	0.19	1
	-0.64	0.15	1
	-0.47	0.09	7
	-0.49	0.05	2
	-0.38	0.05	5
	-0.46	0.03	6
	-0.55	0.08	8
AGV-2, Andesite, USGS, East wall of Guano Valley, Lake Caunty, Oregon, USA
AGV-2	-0.48	0.18	1
Replicate	-0.47	0.12	1
	-0.41	0.06	5
	-0.49	0.05	8
GSP-2, Granodiorite, USGS, Silver Plume, Colorado (USA)
GSP-2	-0.5	0.12	1
Replicate	-0.51	0.22	1
	-0.45	0.07	5
SDC-1, mica schist, USGS, Rock Creek Park,Washington, D.C
	-0.63	0.14	9
SDC-1	-0.46	0.03	10
Replicate	-0.5	0.09	10
	-0.44	0.06	5
1	Li, W.; Beard, B. L.; Li, S., Precise measurement of stable potassium isotope ratios using a single focusing collision cell multi-collector ICP-MS. Journal of Analytical Atomic Spectrometry 2016, 31, (4), 1023-1029.
2	Chen, H.; Tian, Z.; Tuller-Ross, B.; Korotev, Randy L.; Wang, K., High-precision potassium isotopic analysis by MC-ICP-MS: an inter-laboratory comparison and refined K atomic weight. Journal of Analytical Atomic Spectrometry 2019, 34, (1), 160-171.
3	Tuller-Ross, B.; Marty, B.; Chen, H.; Kelley, K. A.; Lee, H.; Wang, K., Potassium isotope systematics of oceanic basalts. Geochimica et Cosmochimica Acta 2019, 259, 144-154.
4	Tuller-Ross, B.; Savage, P. S.; Chen, H.; Wang, K., Potassium isotope fractionation during magmatic differentiation of basalt to rhyolite. Chemical Geology 2019, 525, 37-45.
5	Li, X.; Han, G.; Zhang, Q.; Miao, Z., Optimal separation method for high-precision K isotope analysis by using MC-ICP-MS with a dummy bucket. Journal of Analytical Atomic Spectrometry 2020.
6	Chen, H.; Liu, X.-M.; Wang, K., Potassium isotope fractionation during chemical weathering of basalts. Earth and Planetary Science Letters 2020, 539, 116192.
7	Wang, K.; Jacobsen, S. B., An estimate of the Bulk Silicate Earth potassium isotopic composition based on MC-ICPMS measurements of basalts. Geochimica et Cosmochimica Acta 2016, 178, 223-232.
8	Liu, H.; Wang, K.; Sun, W.-D.; Xiao, Y.; Xue, Y.-Y.; Tuller-Ross, B., Extremely light K in subducted low-T altered oceanic crust: Implications for K recycling in subduction zone. Geochimica et Cosmochimica Acta 2020, 277, 206-223.
9	Morgan, L. E., Santiago Ramos, D. P., Davidheiser-Kroll, B., Faithfull, J., Lloyd, N. S., Ellam, R. M., & Higgins, J. A. , High-precision 41K/39K measurements by MC-ICP-MS indicate terrestrial variability of δ41K. Journal of Analytical Atomic Spectrometry 2018, 33, (2), 175-186.
10	Xu, Y.-K.; Hu, Y.; Chen, X.-Y.; Huang, T.-Y.; Sletten, R. S.; Zhu, D.; Teng, F.-Z., Potassium isotopic compositions of international geological reference materials. Chemical Geology 2019, 513, 101-107.

## Sheet: Table S03
Table S3. Long-term compilation of δ41K in-house pure K standard measured in this study
Run No.	δ41K
1	0.229613
2	0.226175
3	0.274882
4	0.18281
5	0.204764
6	0.269475
7	0.264038
8	0.224272
9	0.218859
10	0.285548
11	0.167133
12	0.282775
13	0.302243
14	0.241138
15	0.259594
16	0.190074
17	0.208922
18	0.229458
19	0.259189
20	0.320447
21	0.275023
22	0.236451
23	0.201995
24	0.260791
25	0.248576
26	0.223163
27	0.29806
28	0.202412
29	0.268913
30	0.211699
31	0.233343
32	0.182624
33	0.178079
34	0.26777
35	0.190113
36	0.236442
37	0.233306
38	0.206107
39	0.230283
40	0.22
41	0.24
42	0.32
43	0.31
44	0.18
45	0.21
46	0.19
47	0.28
48	0.31
49	0.25
50	0.25
51	0.29
52	0.24
53	0.27
54	0.29
55	0.21
56	0.21
57	0.19
58	0.19
59	0.19
60	0.31
61	0.27
62	0.32
63	0.19
64	0.25
65	0.29
66	0.19
67	0.23
68	0.26
69	0.21
70	0.21
71	0.18
72	0.28
73	0.21
74	0.23
75	0.24
76	0.26
77	0.17
78	0.24
79	0.35
80	0.2
81	0.17
82	0.2
83	0.21
84	0.22
85	0.26
86	0.17
87	0.29
88	0.23
89	0.29
90	0.23

## Sheet: Table S04
Table S4. Compilation δ41K value of SRM999c
Run No.	δ41K
1	-0.008
2	-0.018
3	-0.016
4	-0.029
5	0.062
6	0.029
7	0.067
8	0.074
9	0.054
10	0.023
11	0.034
12	0.048
13	0.023
14	0.059
15	0.06
16	0.02
17	0.039
18	0.035
19	0.075
20	-0.053
21	0.044
22	0.01
23	-0.032
24	0.045
25	0.017
26	0.023
27	0.007
28	-0.037
